# Supplementary material
Source: PubMed Central journal article supplement (PMC3645568)
Supplement: 1304354110_pnas.201304354SI.pdf [file 1304354110_pnas.201304354SI.pdf]

# Supporting Information

Topp et al. 10.1073/pnas.1304354110

## SI Text

A comparison of trait values in this study with relevant data from the literature. Azucena was shown previously to have an average of 44% fewer roots than Bala at 27 d postgermination when grown in cylinders of sand (31.4 versus 55.6; extrapolated from ref. 1). At day 16 in our system, Azucena had a median number roots 3D value of 43.6% compared with Bala (6.2/11.0), sug-

gesting that Bala has a more highly branched root system architecture (RSA) regardless of substrate. Azucena also was estimated to have significantly greater root mass at depth in a sandy loam in several treatments (2, 3). This finding correlated well with the almost twofold (1.96×) larger length distribution 2D value (the percent roots in the lower two-thirds of depth) on day 16 for Azucena.

1. Price AH, Steele KA, Moore BJ, Barraclough PB, Clark LJ (2000) A combined RFLP and AFLP linkage map of upland rice. *Theoretical and Applied Genetics* 100:49–56.
2. MacMillan K, Emrich K, Piepho HP, Mullins CE, Price AH (2006) Assessing the importance of genotype × environment interaction for root traits in rice using a mapping population. I: a soil-filled box screen. *Theoretical and Applied Genetics* 113(6):977–986.
3. MacMillan K, Emrich K, Piepho HP, Mullins CE, Price AH (2006) Assessing the importance of genotype × environment interaction for root traits in rice using a mapping population II: conventional QTL analysis. *Theoretical and Applied Genetics* 113(5): 953–964.



**Table S1. Trait names, groupings, descriptions of the features of the RSA they measure, and the method of computing 2D and 3D traits**

| Trait                          | Category               | Ratio | Measurement                                                                                                                                               | Calculation                                                                                                                                                                                                                                                                                                                                                                                                 |
|--------------------------------|------------------------|-------|-----------------------------------------------------------------------------------------------------------------------------------------------------------|-------------------------------------------------------------------------------------------------------------------------------------------------------------------------------------------------------------------------------------------------------------------------------------------------------------------------------------------------------------------------------------------------------------|
| Maximum of roots: 2D and 3D    | Network distribution   | No    | Maximum no. of roots exploring a given soil horizon                                                                                                       | While sweeping a horizontal plane from top to bottom, compute the number of connected components for each horizontal slice. Sort these numbers. The MaxR is the number at the position $0.85 \times \text{depth}$ in the sorted array of numbers (and should correspond to the 85-percentile). The computation of the connected components is done for $y_{\min} < y < y_{\max}$ ; see definition of Depth. |
| Median number roots: 2D and 3D | Network distribution   | No    | Median no. of roots exploring all soil horizons                                                                                                           | While sweeping a horizontal plane from top to bottom, compute the number of connected components. Take the median of the distribution of these numbers along all horizontal slices. The computation is done for $y_{\min} < y < y_{\max}$ ; see definition of Depth.                                                                                                                                        |
| Network bushiness 2D and 3D    | Network distribution   | Yes   | High value indicates heterogeneous branching distribution along vertical axis; low value indicates homogenous branching distribution                      | The ratio of the maximum to the median number of roots                                                                                                                                                                                                                                                                                                                                                      |
| Network length distribution 2D | Network distribution   | Yes   | Ratio of deep to shallow root exploration relative to total network depth                                                                                 | The fraction of network pixels found in the lower 2/3 of the network. The lower 2/3 of the network is defined based on the network depth.                                                                                                                                                                                                                                                                   |
| Network solidity 2D            | Network distribution   | Yes   | 2D estimate of soil coverage (similar to root length density)                                                                                             | Network pixel area 2D divided by network convex area 2D                                                                                                                                                                                                                                                                                                                                                     |
| Network solidity 3D            | Network distribution   | Yes   | 3D estimate of soil coverage (similar to Root Length Density)                                                                                             | Network volume 3D divided by network convex hull volume 3D                                                                                                                                                                                                                                                                                                                                                  |
| Specific root length 2D        | Network distribution   | Yes   | Network length per unit volume: higher value indicates overall thinner roots (similar to traditional $\text{SRL} = \text{root length}/\text{root mass}$ ) | Total root length 2D divided by network volume 2D. Volume is estimated as the sum of cross-sectional areas for all pixels of the medial axis of the root system. The total root length is the number of pixels in the medial axis of the root system                                                                                                                                                        |
| Network convex area 2D         | Network extent         | No    | Overall extent of space the network explores                                                                                                              | The area of the convex hull that encompasses the image                                                                                                                                                                                                                                                                                                                                                      |
| Network convex hull volume 3D  | Network extent         | No    | Overall extent of space the network explores                                                                                                              | The volume of the smallest convex set that contains the voxels composing the reconstructed 3D root.                                                                                                                                                                                                                                                                                                         |
| Maximum root depth 2D          | Network extent         | No    | Deepest extent of root system (similar to traditional $\text{MRD} = \text{maximum rooting depth}$ )                                                       | The number of pixels in the vertical direction from the uppermost network pixel to the lowermost network pixel                                                                                                                                                                                                                                                                                              |
| Maximum network width 2D       | Network extent         | No    | Widest extent of root system                                                                                                                              | The number of pixels in the horizontal direction from the farthest left network pixel to farthest right network pixel                                                                                                                                                                                                                                                                                       |
| Major ellipse axis 2D          | Network extent         | No    | Long axis of network distribution; correlation to maximum network depth depends on the center of mass                                                     | The length of the major axis of the best-fitting ellipse to the network                                                                                                                                                                                                                                                                                                                                     |
| Minor ellipse axis 2D          | Network extent         | No    | Short axis of network distribution; correlation to maximum network width depends on the center of mass                                                    | The length of the minor axis of the best-fitting ellipse to the network                                                                                                                                                                                                                                                                                                                                     |
| Maximum width: depth ratio 2D  | Network shape          | Yes   | Relative shape of network distribution; increasing values indicate an increase in horizontal relative to vertical exploration                             | The value of the network width divided by the value of network depth                                                                                                                                                                                                                                                                                                                                        |
| Ellipse aspect ratio 2D        | Network shape          | Yes   | Relative shape of network distribution; correlation to maximum width depth ratio depends on the center of mass                                            | The ratio of the minor to the major axis of best-fitting ellipse                                                                                                                                                                                                                                                                                                                                            |
| Average root width 2D          | Intrinsic network size | No    | Average width of all roots in the network (related to traditional MRT, maximum root thickness)                                                            | The mean value of the root width estimation computed for all pixels of the medial axis of the entire root system                                                                                                                                                                                                                                                                                            |
| Network pixel area 2D          | Intrinsic network size | No    | Estimate of surface area                                                                                                                                  | Area of network pixels in the image                                                                                                                                                                                                                                                                                                                                                                         |

**Table S1. Cont.**

| Trait                   | Category               | Ratio | Measurement                        | Calculation                                                                                                                                          |
|-------------------------|------------------------|-------|------------------------------------|------------------------------------------------------------------------------------------------------------------------------------------------------|
| Network surface area 2D | Intrinsic network size | No    | Calculation of surface area in 2D  | The sum of the local surface area at each pixel of the network skeleton, as approximated by a tubular shape whose radius is estimated from the image |
| Network surface area 3D | Intrinsic network size | No    | Measurement of surface area in 3D  | Area of voxel faces on the surface of the root model                                                                                                 |
| Network volume 2D       | Intrinsic network size | No    | Calculation of a volume in 2D      | The sum of the local volume at each pixel of the network skeleton, as approximated by a tubular shape whose radius is estimated from the image       |
| Network volume 3D       | Intrinsic network size | No    | Measurement volume in 3D           | Area of voxels comprising the root                                                                                                                   |
| Total root length 2D    | Intrinsic network size | No    | Length of all roots in the network | Length of pixels in the network skeleton                                                                                                             |

**Table S2. Summary of growth rates for all traits between day 12 and day 16**

| Trait                          | Four-day average<br>RIL (%) | Daily average<br>RIL (%) | Four-day average<br>Bala (%) | Daily average<br>Bala (%) | Four-day average<br>Azucena (%) | Daily average<br>Azucena (%) |
|--------------------------------|-----------------------------|--------------------------|------------------------------|---------------------------|---------------------------------|------------------------------|
| Maximum number roots 2D        | 14.33                       | 3.58                     | 11.88                        | 2.97                      | 3.51                            | 0.88                         |
| Maximum number roots 3D        | 20.48                       | 5.12                     | 15.52                        | 3.88                      | 2.26                            | 0.57                         |
| Median number roots 2D         | 16.95                       | 4.24                     | 7.82                         | 1.95                      | 4.64                            | 1.16                         |
| Median number roots 3D         | 22.32                       | 5.58                     | 8.18                         | 2.05                      | 0.82                            | 0.21                         |
| Network bushiness 2D           | -0.65                       | -0.16                    | 4.53                         | 1.13                      | 3.62                            | 0.91                         |
| Network bushiness 3D           | 3.62                        | 0.91                     | 8.42                         | 2.10                      | 8.40                            | 2.10                         |
| Network length distribution 2D | 4.37                        | 1.09                     | 6.90                         | 1.73                      | 11.42                           | 2.85                         |
| Network solidity 2D            | 1.81                        | 0.45                     | 0.96                         | 0.24                      | -2.62                           | -0.66                        |
| Network solidity 3D            | 0.16                        | 0.04                     | -2.54                        | -0.63                     | -15.32                          | -3.83                        |
| Specific root length 2D        | -3.56                       | -0.89                    | -9.54                        | -2.39                     | -0.93                           | -0.23                        |
| Major ellipse axis 2D          | 16.13                       | 4.03                     | 13.86                        | 3.46                      | 31.01                           | 7.75                         |
| Minor ellipse axis 2D          | 12.08                       | 3.02                     | 11.58                        | 2.90                      | 6.47                            | 1.62                         |
| Maximum root depth 2D          | 17.86                       | 4.47                     | 15.97                        | 3.99                      | 31.10                           | 7.77                         |
| Maximum network width 2D       | 15.24                       | 3.81                     | 12.98                        | 3.24                      | 10.27                           | 2.57                         |
| Network convex area 2D         | 34.60                       | 8.65                     | 29.57                        | 7.39                      | 43.21                           | 10.80                        |
| Network convex hull volume 3D  | 47.45                       | 11.86                    | 38.74                        | 9.69                      | 57.25                           | 14.31                        |
| Ellipse aspect ratio 2D        | -2.66                       | -0.66                    | -1.80                        | -0.45                     | -16.99                          | -4.25                        |
| Maximum width depth ratio 2D   | -1.15                       | -0.29                    | -2.20                        | -0.55                     | -13.32                          | -3.33                        |
| Average root width 2D          | 1.94                        | 0.48                     | 3.72                         | 0.93                      | 1.59                            | 0.40                         |
| Network pixel area 2D          | 35.88                       | 8.97                     | 30.67                        | 7.67                      | 37.58                           | 9.40                         |
| Network surface area 2D        | 36.36                       | 9.09                     | 30.92                        | 7.73                      | 37.42                           | 9.36                         |
| Network surface area 3D        | 46.83                       | 11.71                    | 33.20                        | 8.30                      | 38.35                           | 9.59                         |
| Network volume 2D              | 40.63                       | 10.16                    | 40.55                        | 10.14                     | 38.11                           | 9.53                         |
| Network volume 3D              | 42.45                       | 10.61                    | 33.67                        | 8.42                      | 28.66                           | 7.16                         |
| Total root length 2D           | 34.22                       | 8.55                     | 27.01                        | 6.75                      | 35.39                           | 8.85                         |

RIL, recombinant inbred line.

**Table S3. Projected multivariate phenotypes: Summary of the relative contributions of each univariate trait to each composite quantitative trait locus (QTL)**

| Trait                          | Multivariate QTL marker |            |            |                    |          |
|--------------------------------|-------------------------|------------|------------|--------------------|----------|
|                                | C39 (%)                 | a12451 (%) | a18438 (%) | C601-OJ1734E02 (%) | C734 (%) |
| Ellipse aspect ratio 2D        | 7.7                     | 50.8       | 9.7        | 22.1               | 33.5     |
| Maximum width:depth ratio 2D   | 31.6                    | 14.0       | 17.4       | 7.0                | 2.0      |
| Maximum network width 2D       | 28.8                    | 11.4       | 18.1       | 21.1               | 24.0     |
| Maximum root depth 2D          | 19.4                    | 10.3       | 10.3       | 24.5               | 0.0      |
| Network convex area 2D         | 0.6                     | 5.5        | 13.5       | 1.2                | 22.1     |
| Maximum number roots 2D        | 2.2                     | 3.1        | 15.3       | 4.1                | 6.2      |
| Solidity 2D                    | 8.2                     | 4.6        | 4.2        | 7.5                | 2.9      |
| Network length distribution 2D | 0.8                     | 0.3        | 6.9        | 8.9                | 3.0      |
| Average root width 2D          | 0.6                     | 0.0        | 4.5        | 3.6                | 6.3      |

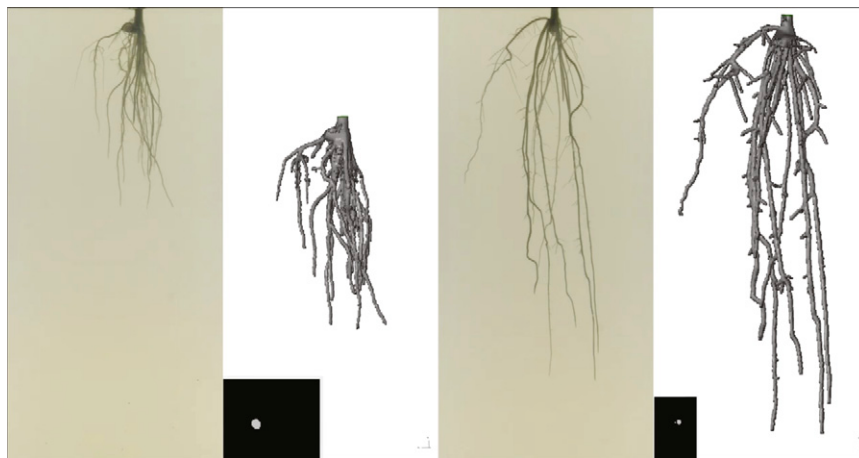

**Movie S1.** Parental lines rotational image series and 3D reconstructions. The movie shows 3D raw data and reconstructions. 2D z-slices are shown in the black inset boxes and correspond to the green line in the 3D image.

[Movie S1](#)

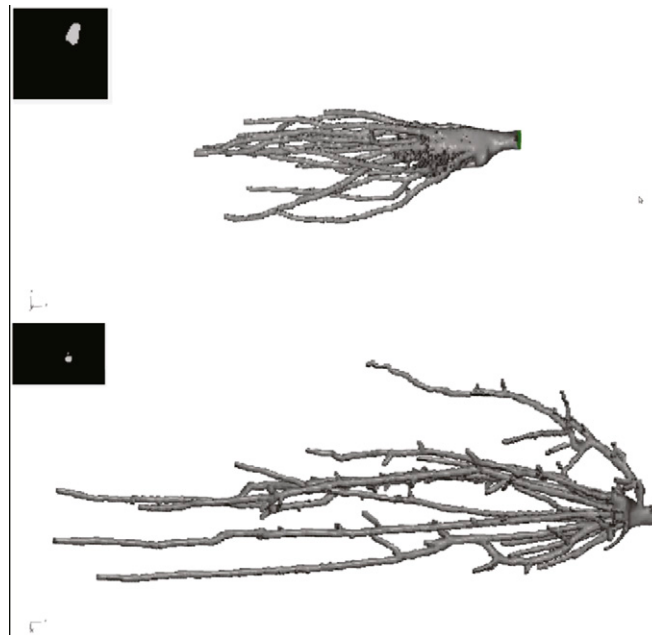

**Movie S2.** Alternative view of parental lines 3D reconstructions. The movie shows alternate 3D raw data and reconstructions. 2D z-slices are shown in the black inset boxes and correspond to the green line in the 3D image.

[Movie S2](#)

**Dataset S1.** Trait correlations: Correlation matrix for all 25 traits using the genetic means

[Dataset S1](#)

**Dataset S2.** Full univariate QTL results: All statistics relevant to the univariate QTL analysis

[Dataset S2](#)

**Dataset S3.** Full multivariate QTL results: All statistics relevant to the multivariate QTL analysis

[Dataset S3](#)
